# Supplementary material
Source: PubMed Central journal article supplement (PMC2669894)
Supplement: NIHMS86605-supplement-1_si_001.pdf [file NIHMS86605-supplement-1_si_001.pdf]

# Supporting Information

for

## Mechanism of Spectral Tuning Going from Retinal in Vacuo to Bovine Rhodopsin and its Mutants: Multireference *ab initio* Quantum Mechanics/Molecular Mechanics Studies

Ahmet Altun,<sup>a,b</sup> Shozo Yokoyama,<sup>b</sup> Keiji Morokuma<sup>a,c</sup>

<sup>a</sup> *Cherry L. Emerson Center for Scientific Computation and Department of Chemistry, Emory University, Atlanta, GA 30322, USA*

<sup>b</sup> *Department of Biology, Rollins Research Center, Emory University, Atlanta, GA 30322, USA*

<sup>c</sup> *Fukui Institute for Fundamental Chemistry, Kyoto University, 34-4 Takano Nishihiraki-cho, Sakyo, Kyoto 606-8103, Japan*

### Contents

#### Vertical Excitation Energies and Oscillator Strengths

1. PSB all-trans-6-*s-trans* retinal
  - 1.1. At B3LYP geometry
  - 1.2. At CASSCF geometry
2. PSB all-trans-6-*s-cis* retinal
  - 2.1. At B3LYP geometr
  - 2.2. At CASSCF geometry
3. PSB 11-*cis*-6-*s-cis* retinal at B3LYP geometry
4. SB 11-*cis*-6-*s-cis* retinal at B3LYP geometry
5. Bovine rhodopsin at B3LYP/AMBER geometry
  - 5.1. PSBR
  - 5.2. SBR with protonated Glu113
  - 5.3. SBR with deprotonated Glu113

6. E122Q mutant of bovine rhodopsin with PSBR at B3LYP/AMBER geometry

7. E113Q mutant of bovine rhodopsin with SBR at B3LYP/AMBER geometry

## VERTICAL EXCITATION ENERGIES AND OSCILLATOR STRENGTHS

Unless stated otherwise, all the calculations are with 6-31G\* basis set,  $T_{sel} = 10^{-6} E_h$  and QM region R1. The vertical excitation energies are given in nm.

### 1. PSB all-trans-6-s-trans retinal

#### 1.1. At B3LYP geometry

| CASSCF                           | DDCI2+Q                           | f     | CASSCF                                                  | DDCI2+Q | f     |      |
|----------------------------------|-----------------------------------|-------|---------------------------------------------------------|---------|-------|------|
| 6-root CAS(12/12) with 6-31G*    |                                   |       | 3-root CAS(12/12) with 6-31G*                           |         |       |      |
| 553.3                            | 545.2                             | 2.28  | 548.1                                                   | 543.6   | 2.14  |      |
| 404.4                            | 415.8                             | 0.04  | 393.2                                                   | 411.9   | 0.02  |      |
| 299.7                            | 307.5                             | 0.01  | 3-root CAS(6/6) with 6-31G*                             |         |       |      |
| 273.7                            | 295.5                             | 0.01  | 381.8                                                   | 558.6   | 2.08  |      |
| 242.6                            | 247.3                             | 0.00  | 334.1                                                   | 384.9   | 0.02  |      |
| 6-root CAS(12/12) with SV(P)     |                                   |       | 3-root CAS(6/6) with 6-31G* and $T_{sel} = 10^{-7} E_h$ |         |       |      |
| 565.6                            | 554.9                             | 2.24  | 381.8                                                   | 544.6   | 2.09  |      |
| 404.9                            | 420.0                             | 0.04  | 334.1                                                   | 378.7   | 0.02  |      |
| 300.9                            | 311.5                             | 0.01  | 6-root CAS(12/12) with TZVP                             |         |       |      |
| 271.4                            | 297.9                             | 0.01  | 572.2                                                   | 570.4   | 2.22  |      |
| 243.1                            | 250.0                             | 0.00  | 406.1                                                   | 438.0   | 0.03  |      |
| 6-root CAS(12/12) with BNANO-DZP |                                   |       | 300.1                                                   | 324.7   | 0.01  |      |
| 559.0                            | 554.7                             | 2.20  | 274.9                                                   | 306.4   | 0.02  |      |
| 404.8                            | 437.0                             | 0.02  | 246.3                                                   | 259.7   | 0.00  |      |
| 299.8                            | 6-root CAS(12/12) with BNANO-TZ2P |       |                                                         | 551.8   | 550.4 | 2.20 |
| 271.8                            | 572.2                             | 563.5 | 2.30                                                    | 403.5   | 437.1 | 0.02 |
| 244.2                            | 406.1                             | 440.8 | 0.03                                                    | 298.1   |       |      |
| 6-root CAS(12/12) with VTZP      |                                   |       | 274.9                                                   | 305.4   | 0.02  |      |
| 572.2                            | 563.5                             | 2.30  | 246.4                                                   | 261.8   | 0.00  |      |
| 406.1                            | 440.8                             | 0.03  |                                                         |         |       |      |
| 300.1                            | 325.2                             | 0.01  |                                                         |         |       |      |
| 274.9                            | 305.4                             | 0.02  |                                                         |         |       |      |
| 246.4                            | 261.8                             | 0.00  |                                                         |         |       |      |

  

| DDACPF/2a-2(12/12) | f    | DDCI3+Q(6/6) | f    | SORCI+Q(6/6) | f    | MRCISD+Q(6/6) | f    |
|--------------------|------|--------------|------|--------------|------|---------------|------|
| 527.1              | 2.36 | 640.2        | 1.91 | 625.7        | 1.88 | 604.1         | 1.98 |
| 394.1              | 0.04 | 473.9        | 0.01 | 490.5        | 0.04 | 457.5         | 0.02 |
| 292.8              | 0.01 |              |      |              |      |               |      |
| 280.7              | 0.02 |              |      |              |      |               |      |
| 238.3              | 0.00 |              |      |              |      |               |      |

#### 1.2. At CASSCF geometry

| CASSCF(12/12) | DDCI2+Q(12/12) | f    | CASSCF(6/6) | SORCI+Q(6/6) | f    | MRCISD+Q(6/6) | f    |
|---------------|----------------|------|-------------|--------------|------|---------------|------|
| 526.0         | 539.4          | 1.70 | 421.1       | 565.1        | 1.56 | 603.5         | 1.38 |
| 344.6         | 359.9          | 0.30 | 294.9       | 395.0        | 0.27 | 412.5         | 0.37 |
| 293.5         | 313.2          | 0.07 |             |              |      |               |      |
| 247.2         | 262.8          | 0.02 |             |              |      |               |      |
| 237.1         | 257.4          | 0.02 |             |              |      |               |      |

## 2. PSB all-trans-6-s-cis retinal

### 2.1. At B3LYP geometry

| <u>CASSCF(12/12)</u> | <u>DDCI2+Q(12/12)</u> | <u>f</u> | <u>CASSCF(6/6)</u> | <u>SORCI+Q(6/6)</u> | <u>f</u> | <u>MRCISD+Q(6/6)</u> | <u>f</u> |
|----------------------|-----------------------|----------|--------------------|---------------------|----------|----------------------|----------|
| 545.0                | 550.9                 | 1.94     | 466.8              | 610.1               | 1.66     | 603.8                | 1.72     |
| 390.4                | 412.0                 | 0.12     | 349.7              | 474.9               | 0.15     | 493.1                | 0.13     |
| 308.7                | 328.3                 | 0.06     |                    |                     |          |                      |          |
| 267.3                | 287.5                 | 0.05     |                    |                     |          |                      |          |
| 246.6                | 257.8                 | 0.00     |                    |                     |          |                      |          |

### 2.2. At CASSCF geometry

| <u>CASSCF(12/12)</u> | <u>DDCI2+Q(12/12)</u> | <u>f</u> | <u>CASSCF(6/6)</u> | <u>SORCI+Q(6/6)</u> | <u>f</u> | <u>MRCISD+Q(6/6)</u> | <u>f</u> |
|----------------------|-----------------------|----------|--------------------|---------------------|----------|----------------------|----------|
| 456.7                | 469.7                 | 1.52     | 415.1              | 505.0               | 1.19     | 545.5                | 0.95     |
| 311.5                | 361.2                 | 0.22     | 328.4              | 395.6               | 0.22     | 421.3                | 0.34     |
| 299.0                | 315.2                 | 0.10     |                    |                     |          |                      |          |
| 247.8                | 261.8                 | 0.02     |                    |                     |          |                      |          |
| 218.9                | 246.4                 | 0.03     |                    |                     |          |                      |          |

## 3. PSB 11-cis-6-s-cis retinal at B3LYP geometry

| <u>CASSCF(12/12)</u> | <u>DDCI2+Q(12/12)</u> | <u>f</u> | <u>CASSCF(6/6)</u> | <u>SORCI+Q(6/6)</u> | <u>f</u> | <u>MRCISD+Q(6/6)</u> | <u>f</u> |
|----------------------|-----------------------|----------|--------------------|---------------------|----------|----------------------|----------|
| 534.6                | 541.4                 | 1.67     | 362.0              | 625.2               | 1.35     | 600.8                | 1.06     |
| 383.1                | 402.8                 | 0.11     | 313.0              | 473.3               | 0.06     | 454.2                | 0.02     |
| 302.5                | 328.1                 | 0.10     |                    |                     |          |                      |          |
| 261.4                | 283.9                 | 0.07     |                    |                     |          |                      |          |
| 244.7                | 259.5                 | 0.03     |                    |                     |          |                      |          |

DDCI2+Q(12/12) f

|       |      |
|-------|------|
| 555.5 | 1.50 |
| 370.2 | 0.06 |

## 4. SB 11-cis-6-s-cis retinal at B3LYP geometry

| <u>6-31G*</u>        |                       |          | <u>6-31G*</u>        |                       |          |
|----------------------|-----------------------|----------|----------------------|-----------------------|----------|
| <u>CASSCF(12/12)</u> | <u>DDCI2+Q(12/12)</u> | <u>f</u> | <u>CASSCF(10,10)</u> | <u>DDCI2+Q(10,10)</u> | <u>f</u> |
| 285.2                | 309.5                 | 1.84     | 285.2                | 299.4                 | 1.82     |
| 230.8                | 308.5                 | 0.06     | 230.4                | 291.8                 | 0.01     |
| 211.1                | 255.9                 | 0.01     | 205.2                | 243.9                 | 0.01     |
| 203.6                | 225.5                 | 0.03     | 199.3                | 216.1                 | 0.03     |
| 190.8                | 204.3                 | 0.03     | 190.9                | 194.2                 | 0.00     |

  

| <u>BNANO-TZ2P</u>    |                       |          | <u>DDCI2+Q(6/6)/6-31G*</u> |                                        |          |                                        |          |
|----------------------|-----------------------|----------|----------------------------|----------------------------------------|----------|----------------------------------------|----------|
| <u>CASSCF(10,10)</u> | <u>DDCI2+Q(10,10)</u> | <u>f</u> | <u>CASSCF(6/6)</u>         | <u>T<sub>sel</sub>=10<sup>-6</sup></u> | <u>f</u> | <u>T<sub>sel</sub>=10<sup>-7</sup></u> | <u>f</u> |
| 284.6                | 319.7                 | 1.72     | 246.2                      | 283.4                                  | 1.69     | 281.7                                  | 1.36     |
| 229.9                | 293.3                 | 0.01     | 231.7                      | 273.5                                  | 0.35     | 269.3                                  | 0.71     |
| 205.2                | 246.7                 | 0.01     |                            |                                        |          |                                        |          |
| 201.7                | 219.8                 | 0.01     |                            |                                        |          |                                        |          |
| 190.5                | 195.9                 | 0.00     |                            |                                        |          |                                        |          |

  

| <u>BNANO-TZ2P</u>  |                     |          |
|--------------------|---------------------|----------|
| <u>CASSCF(6/6)</u> | <u>DDCI2+Q(6/6)</u> | <u>f</u> |
| 246.5              | 297.6               | 1.79     |
| 234.7              | 277.8               | 0.19     |

## 5. Bovine rhodopsin at B3LYP/AMBER geometry

### 5.1. PSBR

| <u>CASSCF(12/12)</u>   | <u>DDCI2+Q(12/12)</u> | <u>f</u> | <u>CASSCF(12/12)</u>   | <u>DDCI2+Q(12/12)</u> | <u>f</u> |
|------------------------|-----------------------|----------|------------------------|-----------------------|----------|
| <u>QM-none with R1</u> |                       |          | <u>QM-none with R2</u> |                       |          |
| 504.2                  | 526.5                 | 1.49     | 341.4                  | 548.8                 | 0.01     |

|                      |       |      |                      |       |      |
|----------------------|-------|------|----------------------|-------|------|
| 359.2                | 391.3 | 0.11 | 332.4                | 488.7 | 0.02 |
| 295.8                | 341.3 | 0.08 | 325.8                | 394.5 | 1.58 |
| 254.8                | 274.6 | 0.10 | 307.9                | 353.8 | 0.01 |
| 237.5                | 261.6 | 0.09 | 242.4                | 296.8 | 0.03 |
| <u>QM/MM with R1</u> |       |      | <u>QM/MM with R2</u> |       |      |
| 356.8                | 435.1 | 0.74 | 357.8                | 431.7 | 1.52 |
| 306.7                | 385.7 | 1.15 | 319.3                | 366.4 | 0.02 |
| 267.6                | 316.6 | 0.04 | 265.6                | 291.4 | 0.02 |
| 232.4                | 284.6 | 0.10 | 231.9                | 265.1 | 0.15 |
| 210.8                | 255.6 | 0.08 | 211.1                | 254.4 | 0.02 |

| <u>CASSCF(6/6) SORCI+Q(6/6)/f MRCISD+Q(6/6)/f</u> | <u>CASSCF(6/6) SORCI+Q(6/6)/f MRCISD+Q(6/6)/f</u> |
|---------------------------------------------------|---------------------------------------------------|
| <u>QM-none with R1</u>                            | <u>QM/MM with R1</u>                              |
| 424.0      615.7/1.21      625.5/1.25             | 332.6      495.3/1.41      498.9/1.59             |
| 318.8      458.6/0.15      449.9/0.16             | 300.6      438.6/0.03      435.5/0.01             |

## 5.2. SBR with protonated Glu113

| <u>CASSCF(12/12) DDCI2+Q(12/12) f</u> | <u>CASSCF(12/12) DDCI2+Q(12/12) f</u> |       |       |      |      |
|---------------------------------------|---------------------------------------|-------|-------|------|------|
| <u>QM-none with R1</u>                | <u>QM-none with R2</u>                |       |       |      |      |
| 296.8                                 | 276.9                                 | 321.0 | 308.6 | 0.06 | 1.64 |
| 235.7                                 | 243.6                                 | 317.9 | 289.2 | 1.70 | 0.00 |
| 215.7                                 | 214.4                                 | 284.1 | 258.7 | 1.11 | 0.00 |
| 208.9                                 | 208.2                                 | 232.2 | 240.2 | 0.03 | 0.01 |
| 195.6                                 | 203.1                                 | 213.8 | 222.9 | 0.05 | 0.01 |
| <u>QM/MM with R1</u>                  | <u>QM/MM with R2</u>                  |       |       |      |      |
| 299.2                                 | 290.3                                 | 335.7 | 336.5 | 1.70 | 1.38 |
| 237.8                                 | 276.6                                 | 316.0 | 321.1 | 0.01 | 0.00 |
| 227.1                                 | 228.0                                 | 260.9 | 318.0 | 0.07 | 0.02 |
| 210.4                                 | 216.0                                 | 236.9 |       | 0.03 |      |
| 196.6                                 | 215.0                                 | 224.6 |       | 0.08 |      |

## 5.3. SBR with deprotonated Glu113

| <u>CASSCF(12/12) DDCI2+Q(12/12) f</u> | <u>CASSCF(12/12) DDCI2+Q(12/12) f</u> |       |       |      |      |
|---------------------------------------|---------------------------------------|-------|-------|------|------|
| <u>QM-none with R1</u>                | <u>QM-none with R2</u>                |       |       |      |      |
| 281.3                                 | 281.9                                 | 312.6 | 331.7 | 1.73 | 0.00 |
| 264.0                                 | 270.1                                 | 302.9 | 327.7 | 0.01 | 0.00 |
| 226.9                                 | 257.6                                 | 299.1 | 297.5 | 0.00 | 1.85 |
| 208.4                                 | 217.6                                 | 259.3 | 286.4 | 0.02 | 0.00 |
| 202.0                                 | 207.1                                 | 238.7 | 230.5 | 0.04 | 0.01 |
| <u>QM/MM with R1</u>                  | <u>QM/MM with R2</u>                  |       |       |      |      |
| 279.7                                 | 270.0                                 | 312.5 | 306.3 | 0.00 | 0.00 |
| 271.1                                 | 255.4                                 | 308.8 | 297.8 | 1.74 | 0.01 |
| 226.4                                 | 253.6                                 | 302.1 | 293.7 | 0.01 | 1.87 |
| 206.9                                 | 218.8                                 | 253.9 | 285.4 | 0.02 | 0.02 |
| 201.2                                 | 211.3                                 | 232.6 | 236.3 | 0.01 | 0.01 |

## 6. E122Q mutant of bovine rhodopsin with PSBR at B3LYP/AMBER geometry

| <u>CASSCF(12/12) DDCI2+Q(12/12) f</u> | <u>CASSCF(12/12) DDCI2+Q(12/12) f</u> |       |       |      |      |
|---------------------------------------|---------------------------------------|-------|-------|------|------|
| <u>QM-none with R1</u>                | <u>QM/MM with R1</u>                  |       |       |      |      |
| 496.7                                 | 348.3                                 | 521.9 | 426.9 | 1.47 | 1.76 |
| 352.1                                 | 298.5                                 | 385.6 | 376.2 | 0.15 | 0.00 |
| 294.4                                 | 263.0                                 | 338.6 | 304.9 | 0.06 | 0.03 |
| 252.0                                 | 228.1                                 | 272.3 | 277.9 | 0.08 | 0.10 |
| 235.9                                 | 208.2                                 | 261.1 | 254.2 | 0.04 | 0.09 |

| <u>CASSCF(6/6) SORCI+Q(6/6)/f MRCISD+Q(6/6)/f</u> | <u>CASSCF(6/6) SORCI+Q(6/6)/f MRCISD+Q(6/6)/f</u> |
|---------------------------------------------------|---------------------------------------------------|
| <u>QM-none with R1</u>                            | <u>QM/MM with R1</u>                              |
| 474.9      586.4/1.19      584.0/1.20             | 290.7      461.7/1.42      489.8/1.50             |
| 328.9      423.8/0.29      410.4/0.32             | 278.8      399.7/0.03      409.4/0.01             |

## 7. E113Q mutant of bovine rhodopsin with SBR at B3LYP/AMBER geometry

| <u>CASSCF(12/12) DDCI2+Q(12/12) f</u> |       |      | <u>CASSCF(12/12) DDCI2+Q(12/12) f</u> |       |      |
|---------------------------------------|-------|------|---------------------------------------|-------|------|
| <u>QM-none with R1</u>                |       |      | <u>QM/MM with R1</u>                  |       |      |
| 285.6                                 | 310.2 | 1.70 | 283.9                                 | 319.7 | 1.71 |
| 229.9                                 | 307.7 | 0.07 | 228.9                                 | 300.8 | 0.01 |
| 211.4                                 | 254.9 | 0.01 | 214.7                                 | 259.8 | 0.02 |
| 204.3                                 | 229.9 | 0.04 | 204.1                                 | 231.8 | 0.04 |
| 192.2                                 | 204.8 | 0.02 | 192.2                                 | 205.6 | 0.02 |

  

| <u>CASSCF(6/6) SORCI+Q(6/6)/f MRCISD+Q(6/6)/f</u> |            |            | <u>CASSCF(6/6) SORCI+Q(6/6)/f MRCISD+Q(6/6)/f</u> |            |            |
|---------------------------------------------------|------------|------------|---------------------------------------------------|------------|------------|
| <u>QM-none with R1</u>                            |            |            | <u>QM/MM with R1</u>                              |            |            |
| 247.1                                             | 349.5/0.05 | 340.7/0.00 | 244.6                                             | 332.9/0.06 | 331.2/0.00 |
| 232.1                                             | 326.5/1.70 | 322.5/2.06 | 226.7                                             | 329.6/1.60 | 322.2/1.95 |
